# Supplementary material for: β-adrenergic Receptor Stimulation Revealed a Novel Regulatory Pathway via Suppressing Histone Deacetylase 3 to Induce Uncoupling Protein 1 Expression in Mice Beige Adipocyte
Source: PubMed Central journal article supplement (PMC6121552; doi:10.3390/ijms19082436), 2018-08-17
Supplement: ijms-19-02436-s001.pdf [file ijms-19-02436-s001.pdf]

## **Supplementary Material**

*Immunoprecipitation (IP) protocol*-Cells were washed with PBS, and then lysed with IP buffer containing 25 mM Tris HCl pH 7.5, 150 mM NaCl, 1% NP-40, 0.1% SDS, 1 mM EDTA, and 1% protease & phosphatase inhibitor cocktail (Nacalai Tesque, USA). After centrifugation (13,200 rpm) at 4 °C for 10 min, cell lysates (2 mg proteins) were mixed with 1 µg HDAC8 antibody for 0.5 h at 4 °C and immune complexes were collected by incubation with protein G-sepharose beads (GE Healthcare, USA) for 1.5 h in the rotatory shaker (4 °C). The mixture was then centrifuged for 1 min at 700 x g (4 °C) and the precipitates were washed three times with IP buffer and then were treated with SDS-PAGE sample buffer. IP samples were denatured (5 min, 65 °C) and analyzed by western blotting using phospho-PKA substrate (RRCS\*/T\*) antibody to measure HDAC8 phosphorylation in Ser<sup>39</sup> as the only one consensus of PKA recognition motif.

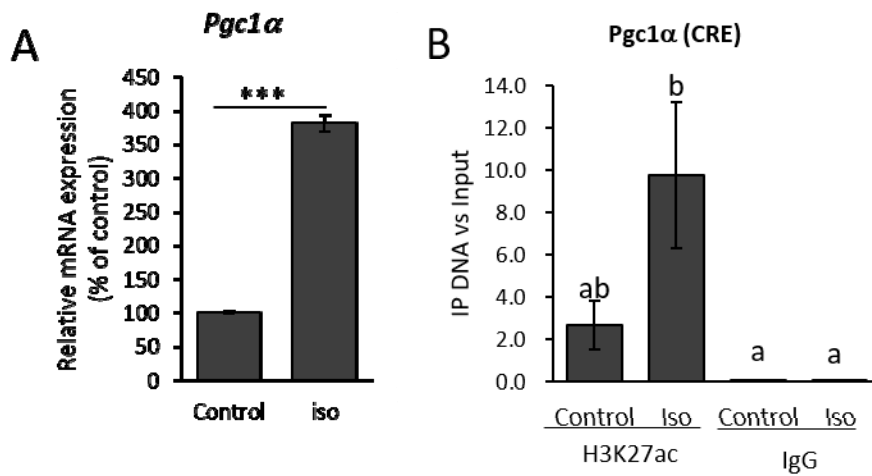

**Figure S1. Histone acetylation state in *Pgc1α* promoter region under  $\beta$ -adrenergic receptor ( $\beta$ -AR) stimulation.** (A) Peroxisome proliferator-activated receptor gamma coactivator 1-alpha (*Pgc1α*) expression and (B) H3K27ac level in *Pgc1α* cAMP response element (CRE) region in immortalized primary inguinal white adipose tissue cell (IWAT cell) after treated by 10  $\mu$ M  $\beta$ -AR agonist isoproterenol (iso) for 4 h. *Pgc1α* signal were normalized to *36b4* internal control. Data are presented as mean  $\pm$  S.E.M. (error bars).  $n = 4-6$  in each group. \*\*\* indicates significant differences at  $p < 0.001$  according to unpaired- $t$  test. Different letters indicate significant difference ( $p < 0.05$ ) according to one-way ANOVA followed by Tukey-Kramer multiple comparison test. Same letters indicate non-significant difference.

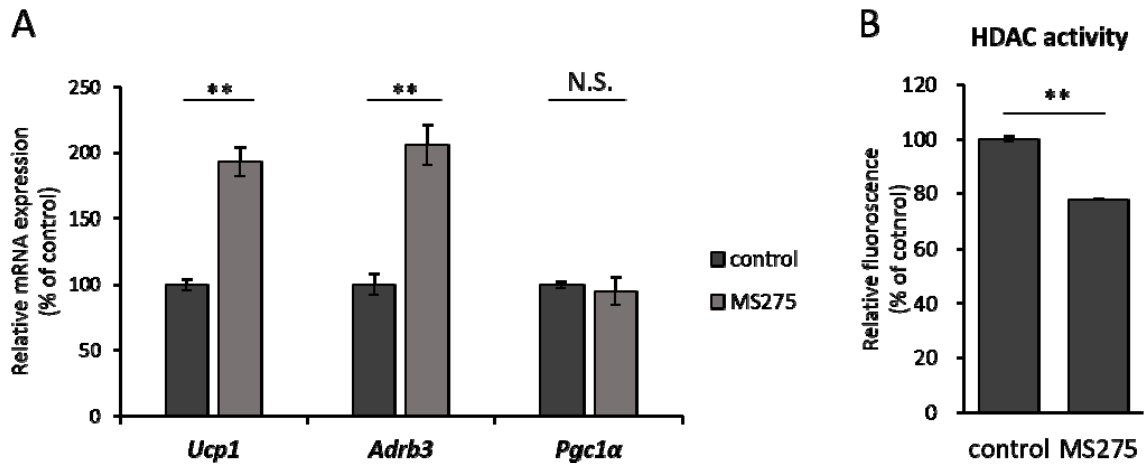

**Figure S2. Class I HDAC inhibitor MS275 regulation on *Ucp1* expression in IWAT cell.** (A) Browning-related gene expression and (B) HDAC activity after treated with 0.15  $\mu$ M MS275 for 24 h. All mRNA signals were normalized to *36b4* internal control. Data are presented as mean  $\pm$  S.E.M. (error bars).  $n = 4-8$  in each group. \*\* indicates significant differences at  $p < 0.01$  according to unpaired- $t$  test. N.S., not significant.

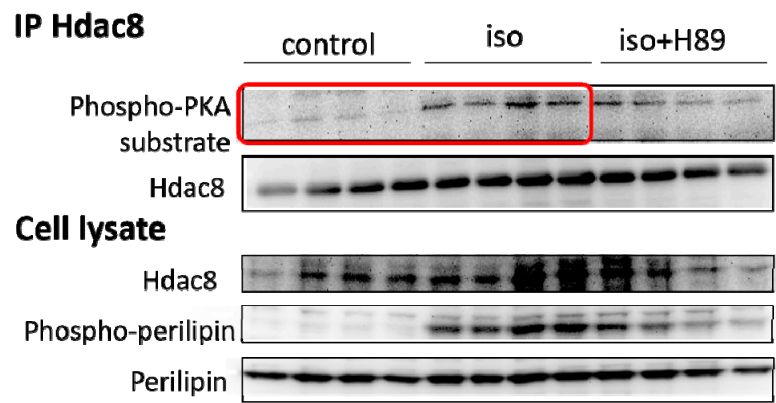

**Figure S3. HDAC8 post-translational modification under isoproterenol stimulation in IWAT cell.**

Protein kinase A (PKA) phosphorylation of immunoprecipitated HDAC8 after induced by 10  $\mu$ M iso or pre-incubated with 5  $\mu$ M PKA inhibitor (H89) for 4.5 h (iso was added in the last 4 h of H89 incubation).  $n = 4$  in each group.

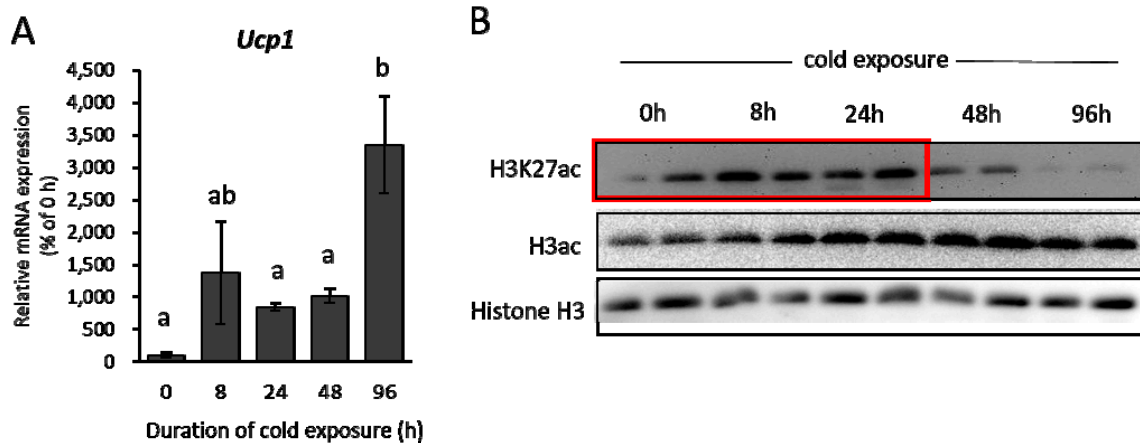

**Figure S4. Histone acetylation state under  $\beta$ -AR stimulation in inguinal white adipose tissue (IWAT).** (A) Uncoupling protein 1 (*Ucp1*) expression and (B) histone 3 lysine 27 acetylation (H3K27ac) level in IWAT. 14 weeks old male C57BL/6N were exposed to cold (10 °C) in different time point. *Ucp1* signals were normalized to *36b4* internal control. Data are presented as mean  $\pm$  S.E.M. (error bars).  $n = 4$  in each group. Different letters indicate significant difference ( $p < 0.05$ ) according to one-way ANOVA followed by Tukey-Kramer multiple comparison test. Same letters indicate non-significant difference.

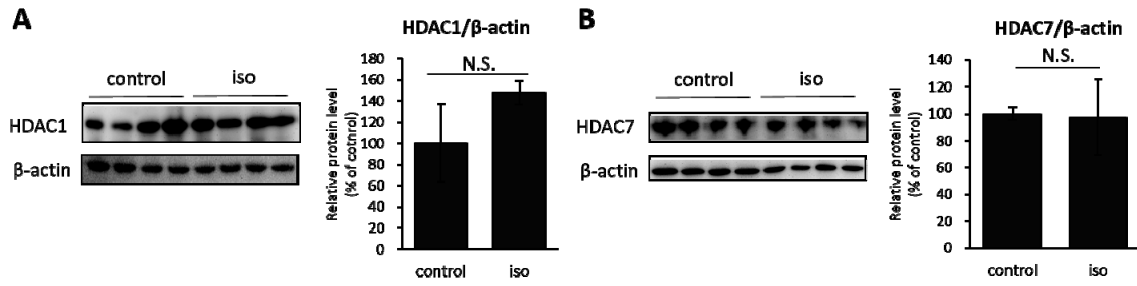

**Figure S5. HDAC1 and HDAC7 protein level under  $\beta$ -AR stimulation in IWAT cell.** *Left side:* (A) HDAC1 and (B) HDAC7 protein level after induced by 10  $\mu$ M iso. *Right side:* protein quantification by ImageJ. Data are presented as mean  $\pm$  S.E.M. (error bars).  $n = 4$  in each group. N.S. indicate not significant according to unpaired- $t$  test.

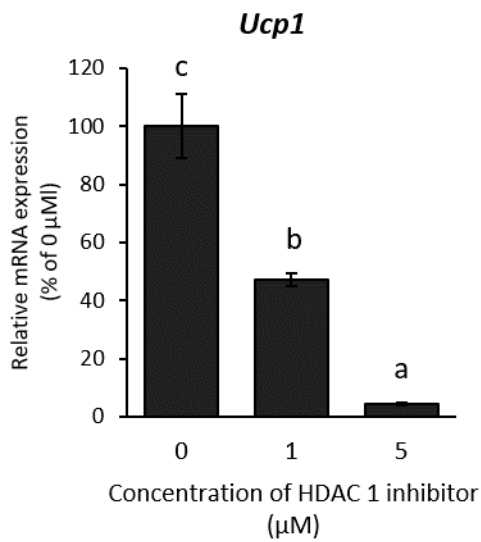

**Figure S6. HDAC1 inhibition negatively regulate *Ucp1* mRNA expression in IWAT cell.** *Ucp1* mRNA level after treated with HDAC1 inhibitor (CAY10398) in different concentration for 24 h. *Ucp1* signals were normalized to *36b4* internal control. Data are presented as mean  $\pm$  S.E.M. (error bars).  $n = 4$  in each group. Different letters indicate significant difference ( $p < 0.05$ ) according to one-way ANOVA followed by Tukey-Kramer multiple comparison test. Same letters indicate non-significant difference.
